# Supplementary material
Source: PubMed Central journal article supplement (PMC4636139)
Supplement: ac5037022_si_001.pdf [file ac5037022_si_001.pdf]

## Supporting Information

### Amphipols outperform dodecylmaltoside micelles in stabilizing membrane protein structure in the gas phase

Antonio N. Calabrese<sup>1</sup>, Thomas G. Watkinson<sup>1</sup>, Peter J. F. Henderson<sup>2</sup>, Sheena E. Radford<sup>1</sup>, Alison E. Ashcroft<sup>1</sup>

<sup>1</sup>*School of Molecular and Cellular Biology and* <sup>2</sup>*School of Biomedical Sciences, Astbury Centre for Structural Molecular Biology, University of Leeds, Leeds, LS2 9JT, UK*

\* Corresponding author: Professor Alison E. Ashcroft, E: [a.e.ashcroft@leeds.ac.uk](mailto:a.e.ashcroft@leeds.ac.uk); Tel/fax: +44(0) 113 343 7273.

#### Table of Contents.

**Table S1:** Collision cross sections (CCSs) of membrane proteins.

**Figure S1:** PagP structure and function.

**Figure S2:** OmpT structure and function.

**Figure S3:** ATDs for the lowest observed charge state of OmpT in both DDM and A8-35.

**Figure S4:** Mhp1 structure and function

**Figure S5:** GalP structure and function

**References**

**Table S1:** Collision cross sections (CCSs) determined either experimentally (from ESI-IMS-MS analysis of proteins solubilised with DDM or A8-35), or theoretically from crystal structures (PDB accession codes are indicated) using the Projection Superposition Approximation.<sup>1</sup> Experimental data from the lowest energy MS conditions required to observe the protein are shown. – indicates the charge state was not observed or the ATDs were of poor signal to noise. Multiple measured CCSs for the same charge state are indicated where multiple features were present in ATDs.

| Protein     | Charge State | Experimentally determined CCS (Å <sup>2</sup> ) |       | Theoretical CCS (Å <sup>2</sup> ) | Trap Collision Energy Used (V) <sup>a</sup> |       |
|-------------|--------------|-------------------------------------------------|-------|-----------------------------------|---------------------------------------------|-------|
|             |              | DDM                                             | A8-35 |                                   | DDM                                         | A8-35 |
| <i>PagP</i> | 5+           | 1857                                            | 1877  | 2290 <sup>2</sup>                 | 50                                          | 60    |
|             | 6+           | 1937                                            | 1937  |                                   |                                             |       |
|             | 7+           | 1956                                            | 1984  |                                   |                                             |       |
|             | 8+           | 2324                                            | 2353  |                                   |                                             |       |
|             | 9+           | 2584                                            | 2584  |                                   |                                             |       |
| <i>OmpT</i> | 5+           | -                                               | 2722  | 3017 (1178)                       | 130                                         | 135   |
|             | 6+           | -                                               | 2783  |                                   |                                             |       |
|             | 7+           | 2841                                            | 2814  |                                   |                                             |       |
|             | 8+           | 2883                                            | -     |                                   |                                             |       |
|             | 9+           | 2933                                            | -     |                                   |                                             |       |
|             | 9+           | 3167                                            | -     |                                   |                                             |       |
|             | 10+          | 3477                                            | -     |                                   |                                             |       |
|             | 11+          | 3686                                            | -     |                                   |                                             |       |
|             | 12+          | 3759                                            | -     |                                   |                                             |       |
|             | 13+          | 3896                                            | -     |                                   |                                             |       |
|             | 14+          | 4388                                            | -     |                                   |                                             |       |
|             | 15+          | 4498                                            | -     |                                   |                                             |       |
|             | 16+          | 4658                                            | -     |                                   |                                             |       |
| <i>Mhp1</i> | 7+           | -                                               | 3916  | 3753 (2JLN)<br>3771 (2X79)        | 180                                         | 180   |
|             | 8+           | -                                               | 4002  |                                   |                                             |       |
|             | 9+           | -                                               | 4121  |                                   |                                             |       |
|             | 9+           | -                                               | 4415  |                                   |                                             |       |
|             | 10+          | -                                               | 4616  |                                   |                                             |       |
|             | 11+          | -                                               | 4892  |                                   |                                             |       |
|             | 12+          | 4939                                            | -     |                                   |                                             |       |
|             | 12+          | 5358                                            | -     |                                   |                                             |       |
|             | 13+          | 5588                                            | -     |                                   |                                             |       |
|             | 14+          | 5684                                            | -     |                                   |                                             |       |
| <i>GalP</i> | 7+           | -                                               | 3028  | 3530                              | 180                                         | 180   |
|             | 8+           | -                                               | 3062  |                                   |                                             |       |
|             | 9+           | -                                               | 3130  |                                   |                                             |       |
|             | 10+          | -                                               | 3950  |                                   |                                             |       |
|             | 11+          | -                                               | 4260  |                                   |                                             |       |
|             | 12+          | -                                               | 4507  |                                   |                                             |       |
|             | 13+          | 4657                                            | 4714  |                                   |                                             |       |
|             | 13+          | 5148                                            | -     |                                   |                                             |       |
|             | 14+          | 5216                                            | -     |                                   |                                             |       |
|             | 14+          | 5990                                            | -     |                                   |                                             |       |
|             | 15+          | 5631                                            | -     |                                   |                                             |       |
|             | 15+          | 6253                                            | -     |                                   |                                             |       |

<sup>a</sup>CCS data shown are for spectra acquired using the lowest energy mass spectral settings that gave resolvable protein peaks (using the collision energy indicated).

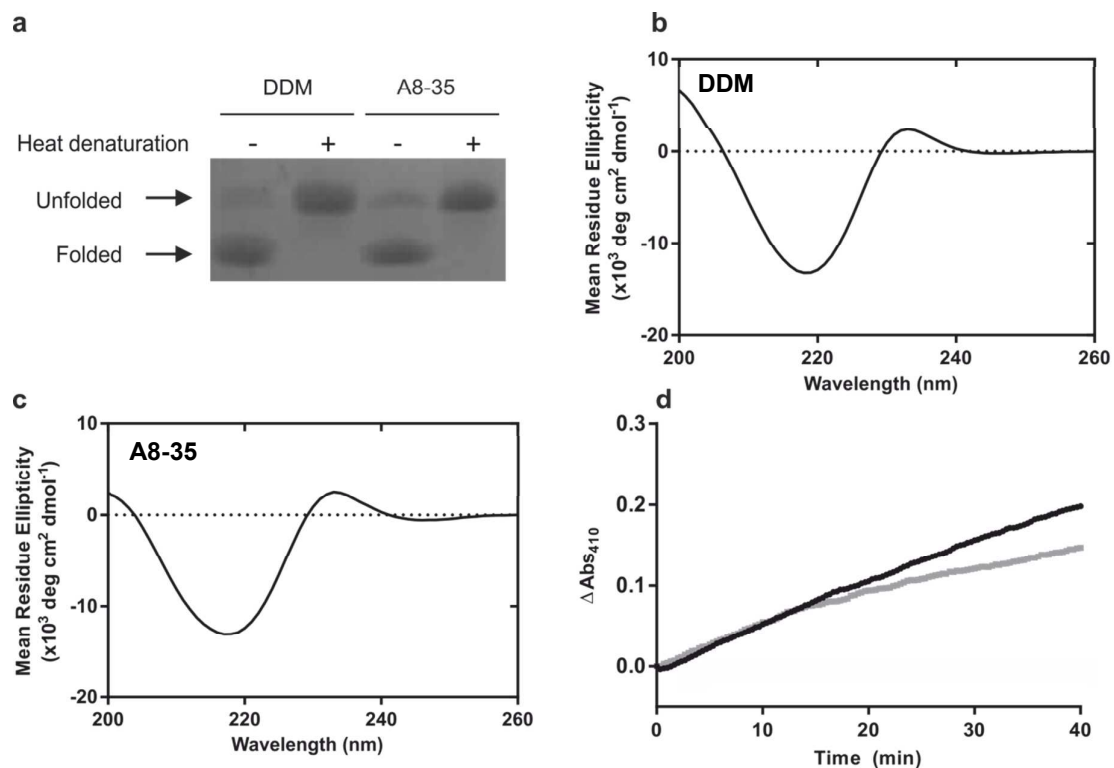

**Figure S1:** PagP structure and function. **(a)** SDS-PAGE of PagP solubilised with either 0.02 % (w/v) DDM or 1:5 (w/w) A8-35, with (+) or without (-) heat denaturation; **(b, c)** far-UV CD spectra of PagP in **(b)** 0.02 % (w/v) DDM or **(c)** 1:5 (w/w) A8-35 containing 100 mM  $\text{NH}_4\text{HCO}_3$ , pH 8.0; **(d)** functional assay showing the increase in absorbance at 410 nm due to the hydrolysis of p-NPP to p-NP at a PagP concentration of 5  $\mu\text{M}$  in 0.02 % (w/v) DDM (grey) or 1:5 (w/w) A8-35 (black) containing 100 mM  $\text{NH}_4\text{HCO}_3$ , pH 8.0. The increase in absorbance as a function of time indicates substrate turnover, and that the enzyme is active. DDM solubilised PagP has reduced activity compared with the A8-35 solubilised protein.

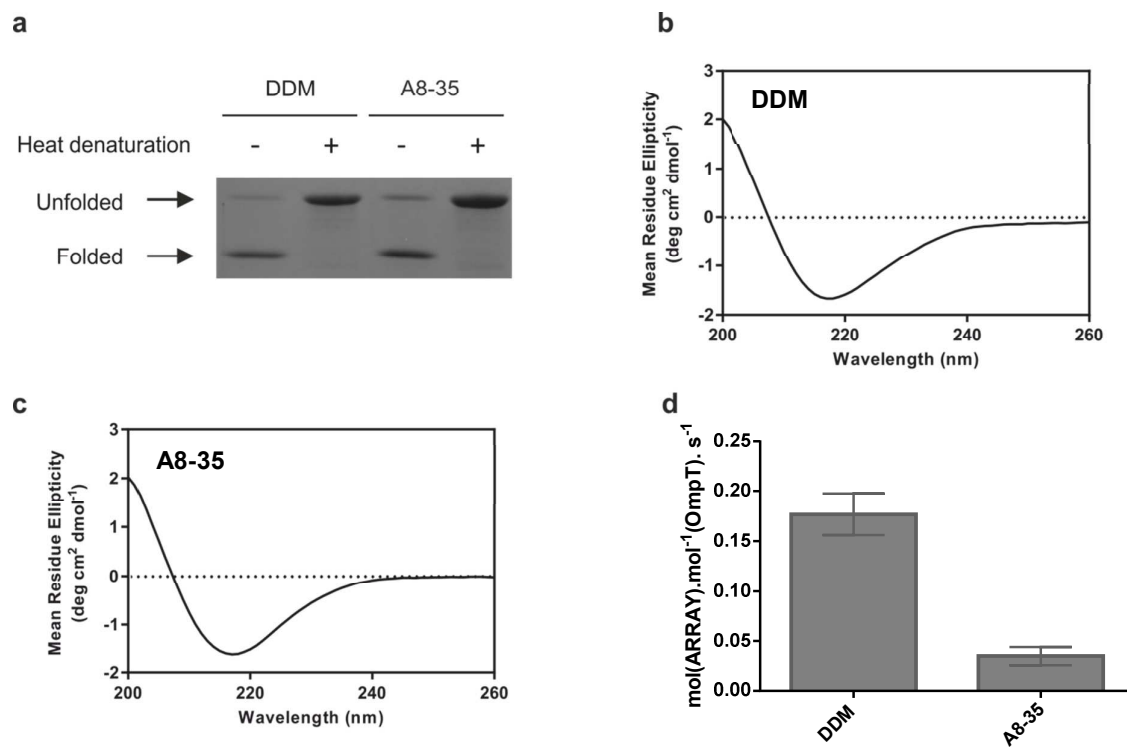

**Figure S2:** *OmpT* structure and function. **(a)** SDS-PAGE of *OmpT* solubilised with either 0.02 % (w/v) DDM or 1:5 (w/w) A8-35, with or without heat denaturation; **(b, c)** far-UV CD spectra of *OmpT* in **(b)** 0.02 % (w/v) DDM or **(c)** 1:5 (w/w) A8-35 containing 100 mM NH<sub>4</sub>HCO<sub>3</sub>, pH 8.0; **(d)** functional assay showing the specific activity of *OmpT* toward cleavage of the self-quenching Abz-ARRAY-NO<sub>3</sub> peptide (n=12) in 0.02 % DDM (w/v) or 1:5 (w/w) A8-35 containing 100 mM NH<sub>4</sub>HCO<sub>3</sub>, pH 8.0.

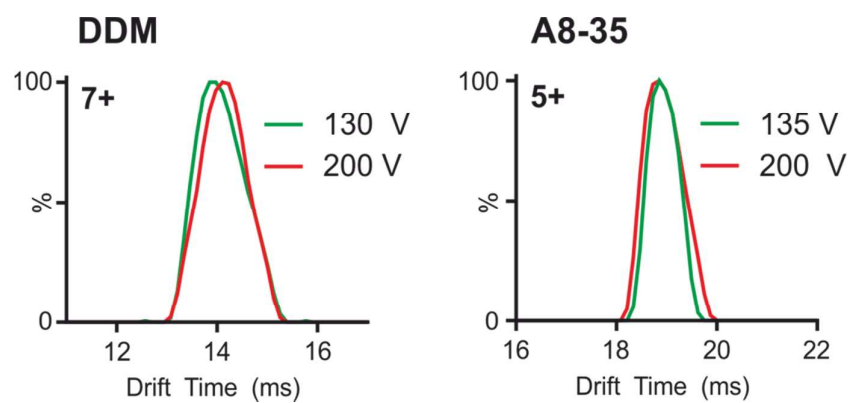

**Figure S3:** ATDs for the lowest observed charge state of *OmpT* in both DDM and A8-35 at the lowest energy required to observe a resolved mass spectrum and at a significantly higher energy.

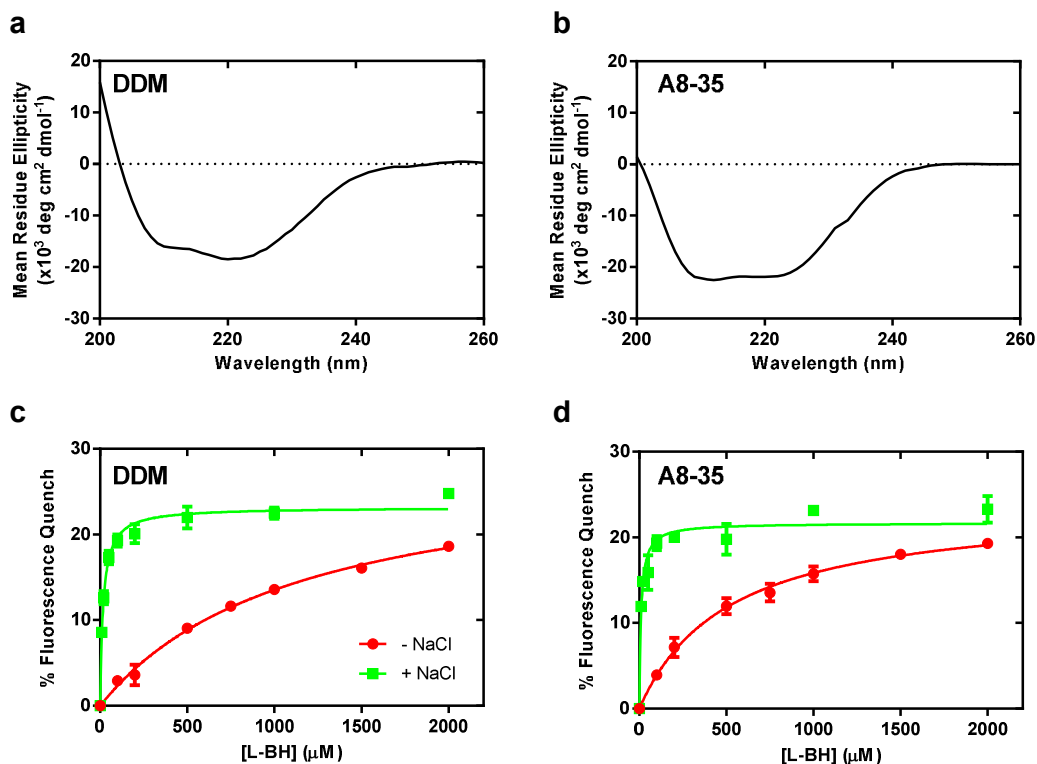

**Figure S4:** Mhp1 structure and function. **(a,b)** Far-UV CD spectra of Mhp1 in **(a)** 0.02 % (w/v) DDM or **(b)** 1:5 (w/w) A8-35 containing 100 mM  $\text{NH}_4\text{HCO}_3$ , pH 8.0. **(c,d)** Tryptophan fluorescence quenching of Mhp1 solubilised in **(c)** 0.02 % (w/v) DDM or **(d)** 1:5 (w/w) A8-35 upon titration with L-benzylhydantoin, in the presence or absence of NaCl. Error bars indicate the SEM of three measurements.  $K_d$  values were determined to be  $1.1 \pm 0.1$  mM (DDM) and  $515 \pm 69$   $\mu\text{M}$  (A8-35) in the absence of  $\text{Na}^+$ , and  $17.6 \pm 1.8$   $\mu\text{M}$  (DDM) and  $10 \pm 1.9$   $\mu\text{M}$  (A8-35) in the presence of  $\text{Na}^+$ .

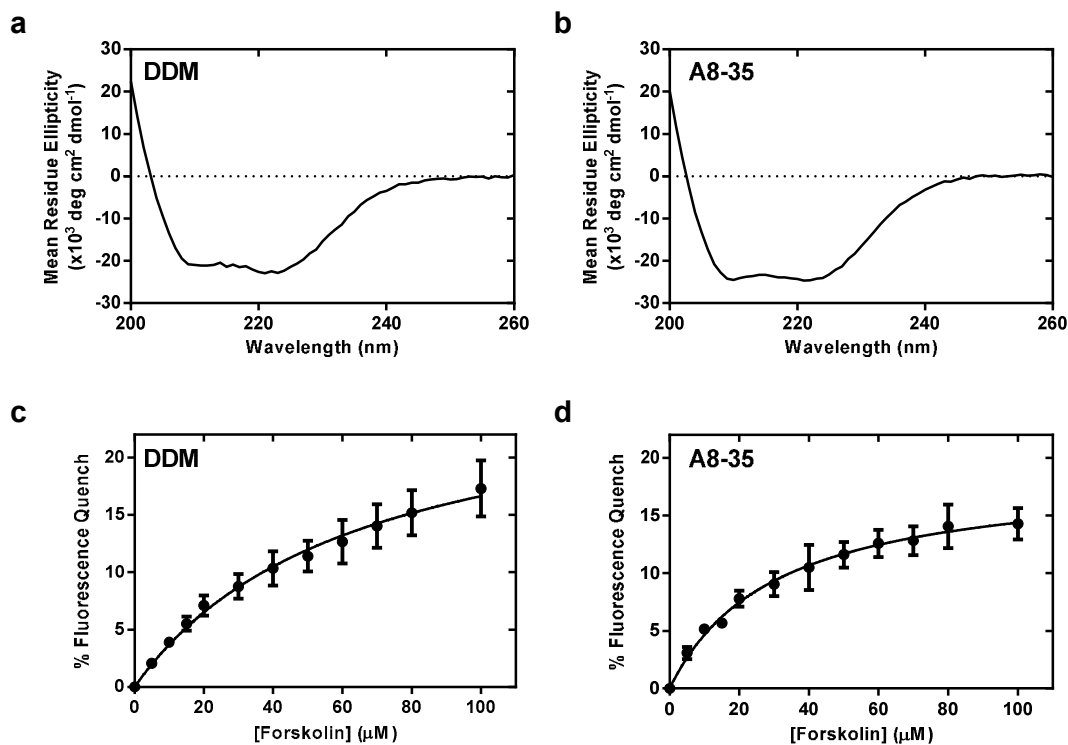

**Figure S5:** GalP structure and function. **(a,b)** Far-UV CD spectra of GalP in **(a)** 0.02 % (w/v) DDM or **(b)** 1:5 (w/w) A8-35 containing 100 mM  $\text{NH}_4\text{HCO}_3$ , pH 8.0. **(c,d)** Tryptophan fluorescence quenching of GalP solubilised in **(c)** 0.02 % (w/v) DDM or **(d)** 1:5 (w/w) A8-35 upon titration with forskolin. Error bars indicate the SEM of three measurements.  $K_d$  values were determined to be  $63 \pm 19 \mu\text{M}$  (0.02 % DDM) and  $30 \pm 6 \mu\text{M}$  (1:5 (w/w) A8-35).

### Supplementary References

- (1) Bleiholder, C.; Wyttenbach, T.; Bowers, M. T. *Int J Mass Spectrom* **2011**, *308*, 1-10.
- (2) Borysik, A. J.; Hewitt, D. J.; Robinson, C. V. *J Am Chem Soc* **2013**, *135*, 6078-6083.
